# Supplementary material for: Electronic structures of two-dimensional covalent organic frameworks based on a series of period 4 transition metal phthalocyanines and ethynyl moieties
Source: Royal Society of Chemistry journal article supplement (doi:10.1039/d4qi01298d), 2024-01-01
Supplement: d4qi01298d1.pdf [file d4qi01298d1.pdf]

## **Electronic Supplementary Information**

### **Electronic Structures of Two-Dimensional Covalent Organic Frameworks Based on Series of Period 4 Transition-metal Phthalocyanine and Ethynyl Moiety**

Xin Chen and Xianran Xing\*

## Caption of Content

|                                                                                                   |   |
|---------------------------------------------------------------------------------------------------|---|
| <b>Figure S1.</b> Electronic band structures of MPc COFs (M = Ti, Mn, Fe, Co, Ni, Cu and Zn)..... | 3 |
| <b>Figure S2.</b> pDOS of MPc COFs (M = Ti, Mn, Fe, Co, Ni, Cu and Zn).<br>.....                  | 4 |
| <b>Table S1.</b> Fraction coordinates for the optimized structures.....                           | 5 |

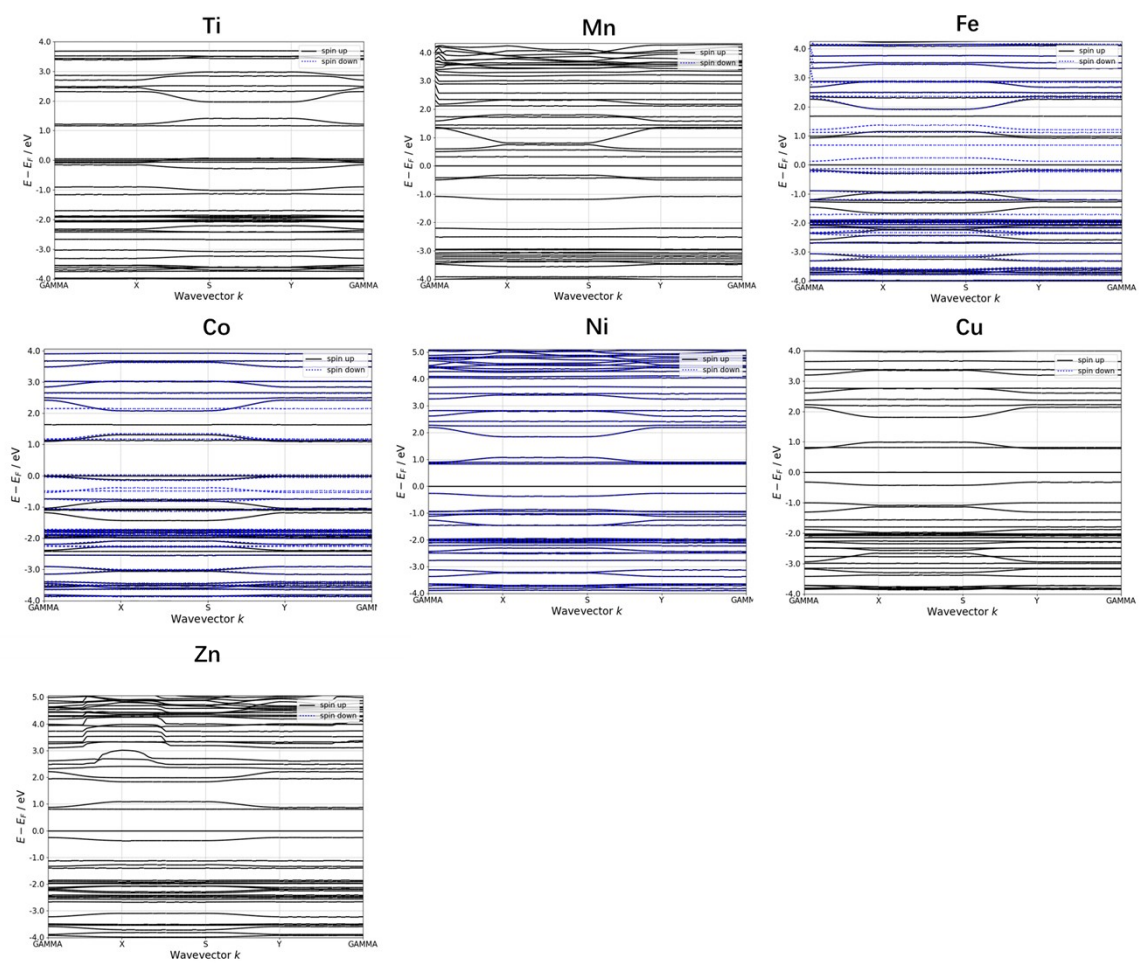

Figure S1. Electronic band structures of MPc COFs (M = Ti, Mn, Fe, Co, Ni, Cu and Zn).

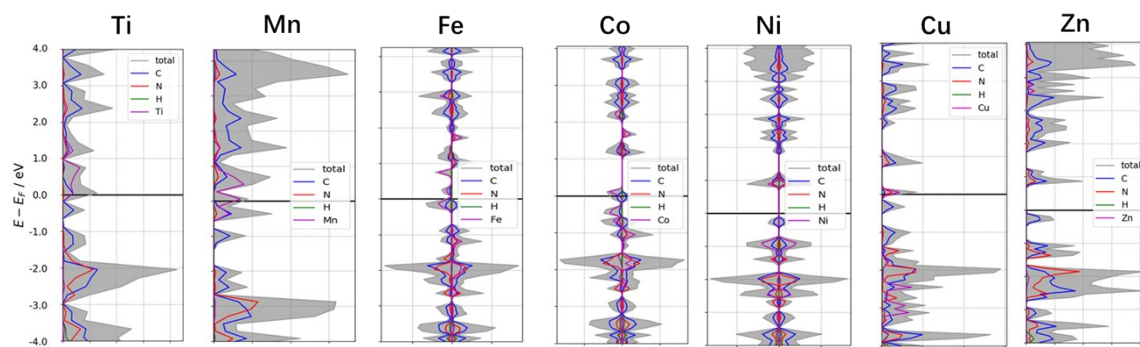

Figure S2. pDOS of MPc COFs (M = Ti, Mn, Fe, Co, Ni, Cu and Zn).

**Table S1.** Fraction coordinates for the optimized structures.

CrPC COF

|                     |                     |                     |
|---------------------|---------------------|---------------------|
| 1.0000000000000000  |                     |                     |
| 17.3500003814352688 | 0.0000000000000000  | 0.0000000000000000  |
| 0.0000000000000000  | 20.0000000000000000 | 0.0000000000000000  |
| -3.5480074821132401 | 0.0000000000000000  | 16.9833493794633590 |

|    |   |    |    |
|----|---|----|----|
| C  | N | H  | Cr |
| 36 | 8 | 12 | 1  |

Direct

|                    |                     |                    |
|--------------------|---------------------|--------------------|
| 0.1650483771611067 | -0.0000003413638330 | 0.1087951389955778 |
| 0.2491969978365543 | 0.0000004121636546  | 0.1009759497030902 |
| 0.2496944727154799 | 0.0000001489993218  | 0.0194570333615064 |
| 0.1673731281787116 | 0.0000003762179930  | 0.9790302035088264 |
| 0.7503055273164131 | -0.0000001496858533 | 0.9805429666305638 |
| 0.7508030021738151 | -0.0000004131929447 | 0.8990240502929526 |
| 0.8326268718343763 | -0.0000003758204027 | 0.0209697964941774 |
| 0.8349516228456423 | 0.0000003413274172  | 0.8912048609846952 |
| 0.0718333141346923 | 0.0000005383800372  | 0.8619812973103617 |
| 0.0566045618841799 | 0.0000002317450662  | 0.7785355600720267 |
| 0.9741799633023770 | -0.0000001589849596 | 0.7490084236359170 |
| 0.9386506400009791 | -0.0000007085732953 | 0.8210587423747636 |
| 0.0613493599604729 | 0.0000007094384045  | 0.1789412575792618 |
| 0.0258200366997167 | 0.0000001591503515  | 0.2509915763478515 |
| 0.9433954380992983 | -0.0000002321026490 | 0.2214644399367299 |
| 0.9281666858367074 | -0.0000005384224888 | 0.1380187027065294 |
| 0.9487771426325498 | -0.0000000815794778 | 0.6661721806578751 |
| 0.0063751240915071 | -0.0000000826206918 | 0.6175986592785179 |
| 0.0886016128368452 | -0.0000002789112750 | 0.6522840533656170 |
| 0.1137722642962381 | -0.0000005579245470 | 0.7323794152436142 |
| 0.3187428312064166 | -0.0000000549660385 | 0.9885228557182785 |
| 0.3942656991109138 | -0.0000000062763972 | 0.0394896075105491 |
| 0.3930180088131231 | -0.0000000428130977 | 0.1219865844036072 |
| 0.3237668866355132 | 0.0000002854575899  | 0.1521513829785248 |

|                    |                     |                     |
|--------------------|---------------------|---------------------|
| 0.0512228574034167 | 0.0000000816289621  | 0.3338278193308831  |
| 0.9936248759204210 | 0.0000000824798765  | 0.3824013407332213  |
| 0.9113983871926014 | 0.0000002786980998  | 0.3477159466077414  |
| 0.8862277357094129 | 0.0000005575156754  | 0.2676205847493912  |
| 0.6812571688441155 | 0.0000000545298935  | 0.0114771443180526  |
| 0.6057343009159726 | 0.0000000059610883  | 0.9605103925246510  |
| 0.6069819911869845 | 0.0000000424588239  | 0.8780134156269940  |
| 0.6762331133405313 | -0.0000002862218940 | 0.8478486170272709  |
| 0.0058501414426398 | 0.0000000025124586  | 0.4660026342024915  |
| 0.9941498584008122 | -0.0000000027289118 | 0.5339973657972974  |
| 0.4682596840174966 | 0.0000000425382184  | 0.0113288553157718  |
| 0.5317403159339118 | -0.0000000426957049 | 0.9886711446177391  |
| 0.1173382913305708 | -0.0000002345033981 | 0.0325239109886837  |
| 0.8826617086832614 | 0.0000002365312890  | 0.9674760890024225  |
| 0.0013060746743778 | -0.0000000610580968 | 0.8882284371028772  |
| 0.9986939252971919 | 0.0000000624611106  | 0.1117715628827208  |
| 0.8625504453355891 | -0.0000001615086960 | 0.8245687395411717  |
| 0.8544223904527271 | -0.0000007099102712 | 0.0979218230164217  |
| 0.1374495546505060 | 0.0000001611900968  | 0.1754312604540925  |
| 0.1455776095458251 | 0.0000007093899318  | 0.9020781769649917  |
| 0.8863169229943643 | 0.0000000947579446  | 0.6386330438380415  |
| 0.1302568441337414 | 0.0000002464601155  | 0.6130286810663839  |
| 0.1758567890206732 | -0.0000000977071365 | 0.7608906558437222  |
| 0.3132433898947257 | 0.0000000564033558  | 0.9247032792305732  |
| 0.4493741083336373 | -0.0000000494703388 | 0.1638075294292305  |
| 0.3287446470416857 | -0.0000002075937278 | 0.2158809888626692  |
| 0.1136830770270480 | -0.0000000947448564 | 0.3613669560843319  |
| 0.8697431559427536 | -0.0000002466138119 | 0.3869713189704395  |
| 0.8241432109437740 | 0.0000000973587494  | 0.2391093441530313  |
| 0.6867566102531674 | -0.0000000565353359 | 0.0752967208299853  |
| 0.5506258916478893 | 0.0000000494382400  | 0.8361924706519834  |
| 0.6712553529040823 | 0.0000002071645122  | 0.7841190111485250  |
| -0.000000000195365 | 0.0000000021718533  | -0.0000000000052190 |

MnPc COF

1.0000000000000000

17.3500003814352688 0.0000000000000000 0.0000000000000000

0.0000000000000000 20.0000000000000000 0.0000000000000000

-3.5480074821132401 0.0000000000000000 16.9833493794633590

C N H Mn

36 8 12 1

Direct

0.1642017115128437 -0.0000000006868469 0.1081905206263726

0.2488052169793701 -0.0000000004078395 0.1007621961008263

0.2492346286450184 -0.0000000006690471 0.0193643053000676

0.1666131936134233 -0.0000000000883918 0.9792647232272049

0.7507653709894377 -0.0000000007659279 0.9806356959097925

0.7511947833503584 -0.0000000004461542 0.8992378034890193

0.8333868047974091 -0.0000000002172861 0.0207352766147677

0.8357982884320474 -0.0000000006846744 0.8918094779742676

0.0712752586241876 0.0000000011164743 0.8629401021720620

0.0563669100329027 0.000000001157697 0.7789738109095447

0.9743345301819429 -0.0000000005534296 0.7494659753558087

0.9391762841786160 -0.0000000000933047 0.8220526959629753

0.0608237163665842 -0.0000000001301778 0.1779473052815501

0.0256654698151405 -0.0000000004494066 0.2505340233081288

0.9436330916695718 0.0000000003051139 0.2210261921694591

0.9287247337000014 0.0000000011565611 0.1370598944537796

0.9486498531671380 -0.0000000002274011 0.6663817345518840

0.0061350455604839 -0.000000000080431 0.6179395645108412

0.0880799729550058 0.0000000005066681 0.6528554279007163

0.1134976342075870 0.0000000004725200 0.7330894816922068

0.3182436832285145 -0.0000000002383848 0.9882240271222388

0.3938118718317037 0.0000000002188296 0.0391744489911993

0.3924753275202830 -0.0000000000583044 0.1216436479437131

0.3232343907882363 -0.0000000000786624 0.1519759632844916

0.0513501478207050 -0.0000000002259099 0.3336182668570067  
0.9938649542846723 0.0000000000354895 0.3820604353205413  
0.9119200277203903 0.0000000004937061 0.3471445726801733  
0.8865023663319800 0.0000000005043126 0.2669105181894013  
0.6817563180497721 -0.0000000002480224 0.0117759721779077  
0.6061881288480994 0.0000000002447246 0.9608255511587712  
0.6075246721459259 -0.0000000000849651 0.8783563518637855  
0.6767656079806210 -0.0000000001361249 0.8480240357594387  
0.0058677127110145 -0.0000000008128696 0.4660964260032724  
0.9941322875529828 -0.0000000008396493 0.5339035741274859  
0.4681334511814484 0.0000000002629410 0.0111011597978410  
0.5318665492642810 0.0000000002808396 0.9888988396400342  
0.1171218458932304 -0.00000000023327714 0.0323833948845904  
0.8828781571180689 -0.00000000023753678 0.9676166043529103  
0.0014377478931249 0.0000000013299549 0.8887744362981395  
0.9985622549230169 0.0000000012638038 0.1112255653883998  
0.8626148008093867 -0.0000000005896634 0.8245482619642790  
0.8547152164060745 -0.0000000015139440 0.0978499399662689  
0.1373852000566712 -0.0000000007925213 0.1754517379746220  
0.1452847824124143 -0.0000000012644574 0.9021500601365195  
0.8860919997159664 0.0000000002248360 0.6391906428501980  
0.1298644339341120 0.0000000005460610 0.6137577246744832  
0.1756071668172761 -0.0000000002405874 0.7615862022119425  
0.3125068242483630 -0.0000000001346734 0.9243776555780705  
0.4487408725671652 -0.000000000370358 0.1634914902150721  
0.3281481433787469 -0.0000000002414991 0.2157220820499026  
0.1139080012725113 0.0000000001856428 0.3608093578868911  
0.8701355666052506 0.0000000004970104 0.3862422752874340  
0.8243928327553905 -0.0000000002356953 0.2384137974483026  
0.6874931766072415 -0.0000000001342107 0.0756223442396046  
0.5512591276136607 -0.000000000090211 0.8365085097512931  
0.6718518565485793 -0.0000000002503804 0.7842779170359807  
-0.0000000036159506 0.0000000085413929 0.0000000013765187



FePc COF

```

1.0000000000000000
17.3500003814352688 0.0000000000000000 0.0000000000000000
0.0000000000000000 20.0000000000000000 0.0000000000000000
-3.5480074821132401 0.0000000000000000 16.9833493794633590
C N H Fe
36 8 12 1
  
```

Direct

```

0.1643602833885215 0.0000000134437415 0.1084283416545792
0.2490343821829725 0.0000000081848352 0.1010547199451117
0.2493585044192609 0.0000000002643564 0.0196231687356548
0.1666720213662669 -0.0000000025346044 0.9795267849051628
0.7506414981412792 -0.0000000024549511 0.9803768290926624
0.7509656222943022 -0.0000000056783396 0.8989452772101936
0.8333279784912585 0.0000000068725239 0.0204732105305957
0.8356397213409227 -0.0000000062022894 0.8915716601688476
0.0712752047977429 -0.0000000105087197 0.8629545713032800
0.0564135586536826 -0.0000000144026189 0.7789475773086412
0.9743507781266695 -0.0000000120579388 0.7494282359971557
0.9391414152505260 -0.0000000076402769 0.8219685362892893
0.0608585840464080 0.0000000099144895 0.1780314658575257
0.0256492176077947 0.0000000081380342 0.2505717686994913
0.9435864430272682 0.000000006306842 0.2210524313820182
0.9287248018602533 -0.0000000012531106 0.1370454369923067
0.9487298049998313 -0.0000000040767366 0.6663390878789557
0.0062517278638917 0.0000000022837103 0.6179327496209873
0.0882290295013242 0.0000000008832377 0.6527207113361511
0.1135355115902776 -0.0000000104099085 0.7330056939444959
0.3184398604571642 0.0000000009579102 0.9886159204161721
0.3940156603560240 0.0000000001438136 0.0395900765014325
0.3928544550299734 -0.0000000006462385 0.1220842376498803
0.3235263904794746 0.0000000030248344 0.1523055707740993
0.0512701912419553 0.0000000061028530 0.3336609099449704
  
```

|                     |                     |                     |
|---------------------|---------------------|---------------------|
| 0.9937482675920436  | -0.000000000335466  | 0.3820672486692160  |
| 0.9117709689653474  | -0.0000000029148058 | 0.3472792863285287  |
| 0.8864644865296486  | 0.0000000006132906  | 0.2669943062370853  |
| 0.6815601385616683  | -0.0000000038308037 | 0.0113840772651394  |
| 0.6059843405300340  | 0.0000000006387898  | 0.9604099201655055  |
| 0.6071455452372397  | 0.0000000021962166  | 0.8779157600766959  |
| 0.6764736117772897  | -0.0000000012378050 | 0.8476944294552874  |
| 0.0058736976158032  | -0.0000000020079329 | 0.4661064861075917  |
| 0.9941262979899772  | 0.0000000009261654  | 0.5338935133509002  |
| 0.4682398787384511  | -0.0000000036284873 | 0.0113071685514319  |
| 0.5317601208684611  | -0.0000000010659339 | 0.9886928285529233  |
| 0.1172264350071357  | 0.0000000073765261  | 0.0326575771777595  |
| 0.8827735587330646  | 0.0000000151447469  | 0.9673424135213304  |
| 0.0013427788250298  | 0.0000000078168263  | 0.8886833232461653  |
| 0.9986572421152868  | -0.0000000122146883 | 0.1113167110323288  |
| 0.8625752253679040  | -0.0000000084821088 | 0.8243967282972842  |
| 0.8547595364873999  | 0.0000000027292819  | 0.0976160795338891  |
| 0.1374247756286722  | 0.0000000146963111  | 0.1756032721316975  |
| 0.1452404561617578  | -0.0000000104997643 | 0.9023839186009902  |
| 0.8862342787912311  | -0.0000000003289756 | 0.6388281736500847  |
| 0.1299692453050595  | 0.0000000029487919  | 0.6135091596309417  |
| 0.1756622299731308  | 0.0000000018395719  | 0.7613451473603960  |
| 0.3129776464122813  | -0.0000000004331369 | 0.9248097591294012  |
| 0.4492239326489255  | -0.0000000024526172 | 0.1638829659125352  |
| 0.3285492248084871  | 0.0000000001242059  | 0.2160714074447216  |
| 0.1137657174190067  | 0.0000000007337072  | 0.3611718236888641  |
| 0.8700307524528959  | -0.0000000020072785 | 0.3864908363434638  |
| 0.8243377701665260  | -0.0000000026687241 | 0.2386548504837864  |
| 0.6870223514730635  | 0.0000000001668062  | 0.0751902384918511  |
| 0.5507760675380758  | -0.0000000004638157 | 0.8361170327789135  |
| 0.6714507741325699  | 0.0000000016826381  | 0.7839285906553812  |
| -0.0000000003685130 | 0.0000000116572575  | -0.0000000080117500 |

CoPc COF

1.0000000000000000

|                     |                     |                     |
|---------------------|---------------------|---------------------|
| 17.3500003814352688 | 0.0000000000000000  | 0.0000000000000000  |
| 0.0000000000000000  | 20.0000000000000000 | 0.0000000000000000  |
| -3.5480074821132401 | 0.0000000000000000  | 16.9833493794633590 |

|    |   |    |    |
|----|---|----|----|
| C  | N | H  | Co |
| 36 | 8 | 12 | 1  |

Direct

|                    |                    |                    |
|--------------------|--------------------|--------------------|
| 0.1637582714691561 | 0.0000000000000000 | 0.1078020320539110 |
| 0.2484921408155145 | 0.0000000000000000 | 0.1005129353609462 |
| 0.2489136256784477 | 0.0000000000000000 | 0.0192153413687208 |
| 0.1661883108607611 | 0.0000000000000000 | 0.9792537733492281 |
| 0.7510863743215523 | 0.0000000000000000 | 0.9807846586312792 |
| 0.7515078591844855 | 0.0000000000000000 | 0.8994870646390538 |
| 0.8338116891392389 | 0.0000000000000000 | 0.0207462266507719 |
| 0.8362417285308439 | 0.0000000000000000 | 0.8921979679460890 |
| 0.0711232682994236 | 0.0000000000000000 | 0.8632663703385361 |
| 0.0562633869971165 | 0.0000000000000000 | 0.7791633965782196 |
| 0.9744085289944451 | 0.0000000000000000 | 0.7498132976751108 |
| 0.9394109678141334 | 0.0000000000000000 | 0.8228437996669626 |
| 0.0605890321858666 | 0.0000000000000000 | 0.1771562003330374 |
| 0.0255914710055549 | 0.0000000000000000 | 0.2501867023248892 |
| 0.9437366130028835 | 0.0000000000000000 | 0.2208366034217804 |
| 0.9288767317005764 | 0.0000000000000000 | 0.1367336296614639 |
| 0.9486881686562256 | 0.0000000000000000 | 0.6667755744396473 |
| 0.0062065289921449 | 0.0000000000000000 | 0.6180977802166154 |
| 0.0880255347353369 | 0.0000000000000000 | 0.6528866940698208 |
| 0.1133348396732927 | 0.0000000000000000 | 0.7332463525445050 |
| 0.3179800508139223 | 0.0000000000000000 | 0.9880409998055342 |
| 0.3935911007919799 | 0.0000000000000000 | 0.0389742118339811 |
| 0.3922469577603351 | 0.0000000000000000 | 0.1214414917855677 |
| 0.3229671631200759 | 0.0000000000000000 | 0.1517463953978009 |
| 0.0513118313437744 | 0.0000000000000000 | 0.3332244255603527 |
| 0.9937934710078551 | 0.0000000000000000 | 0.3819022197833846 |

|                    |                    |                    |
|--------------------|--------------------|--------------------|
| 0.9119744652646631 | 0.0000000000000000 | 0.3471133059301792 |
| 0.8866651603267073 | 0.0000000000000000 | 0.2667536474554950 |
| 0.6820199491860777 | 0.0000000000000000 | 0.0119590001944658 |
| 0.6064088992080201 | 0.0000000000000000 | 0.9610257881660189 |
| 0.6077530422396649 | 0.0000000000000000 | 0.8785585082144323 |
| 0.6770328368799241 | 0.0000000000000000 | 0.8482536046021991 |
| 0.0058421009588940 | 0.0000000000000000 | 0.4660689404304463 |
| 0.9941578990411060 | 0.0000000000000000 | 0.5339310595695537 |
| 0.4680542449383367 | 0.0000000000000000 | 0.0109477401975013 |
| 0.5319457550616633 | 0.0000000000000000 | 0.9890522598024987 |
| 0.1165791713656219 | 0.0000000000000000 | 0.0321659613868519 |
| 0.8834208286343781 | 0.0000000000000000 | 0.9678340386131481 |
| 0.0015190885880330 | 0.0000000000000000 | 0.8894908643191215 |
| 0.9984809114119670 | 0.0000000000000000 | 0.1105091356808785 |
| 0.8629081539611221 | 0.0000000000000000 | 0.8249793934885616 |
| 0.8549010495171316 | 0.0000000000000000 | 0.0978542035169880 |
| 0.1370918460388779 | 0.0000000000000000 | 0.1750206065114384 |
| 0.1450989504828684 | 0.0000000000000000 | 0.9021457964830120 |
| 0.8861868084564790 | 0.0000000000000000 | 0.6393190636742858 |
| 0.1297702432934926 | 0.0000000000000000 | 0.6137201488326482 |
| 0.1754845915003926 | 0.0000000000000000 | 0.7615967099833298 |
| 0.3123958360441677 | 0.0000000000000000 | 0.9242164737748411 |
| 0.4485530813557261 | 0.0000000000000000 | 0.1633096776258540 |
| 0.3280161345179025 | 0.0000000000000000 | 0.2155049615254825 |
| 0.1138131915435210 | 0.0000000000000000 | 0.3606809363257142 |
| 0.8702297567065074 | 0.0000000000000000 | 0.3862798511673518 |
| 0.8245154084996074 | 0.0000000000000000 | 0.2384032900166702 |
| 0.6876041639558323 | 0.0000000000000000 | 0.0757835262251589 |
| 0.5514469186442739 | 0.0000000000000000 | 0.8366903223741460 |
| 0.6719838654820975 | 0.0000000000000000 | 0.7844950384745175 |
| 0.0000000000000000 | 0.0000000000000000 | 0.0000000000000000 |

NiPc COF

1.0000000000000000  
17.3500003814352688 0.0000000000000000 0.0000000000000000  
0.0000000000000000 20.0000000000000000 0.0000000000000000  
-3.5480074821132401 0.0000000000000000 16.9833493794633590  
C N H Ni  
36 8 12 1

Direct

0.1642017131266118 -0.0000000017451358 0.1081905245413746  
0.2488052223769152 -0.0000000006388028 0.1007622023518470  
0.2492346270843160 0.0000000001176996 0.0193643055133576  
0.1666131934648269 0.0000000008321519 0.9792647193201264  
0.7507653722388808 -0.0000000000004357 0.9806356954541650  
0.7511947775150303 -0.0000000007112890 0.8992377978999214  
0.8333868069276390 0.0000000009384074 0.0207352780861232  
0.8357982872034359 -0.0000000017965322 0.8918094765894324  
0.0712752578424968 0.0000000010831994 0.8629401011970383  
0.0563669111079788 -0.0000000006225849 0.7789738082684309  
0.9743345308109040 -0.0000000006210265 0.7494659743755413  
0.9391762865555348 -0.0000000002219773 0.8220527027458344  
0.0608237121247605 -0.0000000002032262 0.1779472990006197  
0.0256654697658976 -0.0000000006034774 0.2505340247630550  
0.9436330891901021 -0.0000000005154459 0.2210261942038795  
0.9287247367304895 0.0000000012018982 0.1370598974625402  
0.9486498472745397 -0.0000000001307046 0.6663817352496207  
0.0061350480281173 0.0000000001031247 0.6179395680223700  
0.0880799762999322 0.0000000000836625 0.6528554246269007  
0.1134976352989178 -0.0000000005268283 0.7330894746237999  
0.3182436852656030 -0.0000000004128136 0.9882240335135988  
0.3938118786950910 -0.0000000004863466 0.0391744518794510  
0.3924753384257098 -0.0000000001204298 0.1216436561248569  
0.3232343951898396 0.0000000000354568 0.1519759696222202  
0.0513501528141037 -0.0000000001654629 0.3336182657181360  
0.9938649520072863 0.0000000001092580 0.3820604315560489

0.9119200235593221 0.000000000844283 0.3471445752515473  
0.8865023645538638 -0.0000000004272176 0.2669105247424260  
0.6817563145080817 -0.0000000004373716 0.0117759658317099  
0.6061881210831657 -0.0000000004501958 0.9608255477639757  
0.6075246619087791 -0.0000000001481974 0.8783563440055359  
0.6767656049646444 0.000000000054374 0.8480240299488969  
0.0058677124073061 -0.0000000004865804 0.4660964342195963  
0.9941322871782720 -0.0000000004135629 0.5339035646316560  
0.4681334450185718 0.0000000001507337 0.0111011688080445  
0.5318665544084741 0.0000000001514636 0.9888988306453008  
0.1171218422289550 -0.00000000034155755 0.0323833958905904  
0.8828781599476032 -0.00000000032674235 0.9676166086826020  
0.0014377599660212 0.0000000002828426 0.8887744450843735  
0.9985622401575640 0.0000000001951141 0.1112255514687932  
0.8626148036002482 -0.0000000002008145 0.8245482608102590  
0.8547152153473957 0.00000000015967025 0.0978499406251726  
0.1373851961308513 0.0000000002390623 0.1754517394970733  
0.1452847853445222 0.00000000013684074 0.9021500588934015  
0.8860919973814868 -0.0000000001591992 0.6391906373529251  
0.1298644387093809 0.0000000003976433 0.6137577168541795  
0.1756071716805279 -0.0000000000767131 0.7615862026506940  
0.3125068299194267 -0.0000000001363435 0.9243776577129467  
0.4487408852923302 0.0000000001999740 0.1634914970322814  
0.3281481501843863 0.0000000000811607 0.2157220931933272  
0.1139080029425615 -0.0000000002068261 0.3608093627833227  
0.8701355615578941 0.0000000003406179 0.3862422826658150  
0.8243928275692703 0.000000000057326 0.2384137966468145  
0.6874931700717751 -0.0000000001464334 0.0756223419758313  
0.5512591154831121 0.0000000002148948 0.8365085031374392  
0.6718518500723949 0.0000000001080135 0.7842779064756660  
0.0000000034568506 0.0000000095678865 0.0000000020075112

CuPc COF

```

1.0000000000000000
  17.3500003814352688   0.0000000000000000   0.0000000000000000
    0.0000000000000000  20.0000000000000000   0.0000000000000000
   -3.5480074821132401   0.0000000000000000   16.9833493794633590
C     N     H     Cu
  36     8    12     1
  
```

Direct

```

0.1655689551024091  0.0000000188457205  0.1095917536564722
0.2505723982934412  0.0000000028090551  0.1023689500161734
0.2508033877687586 -0.0000000042762514  0.0207413940170496
0.1679768269268742  0.0000000071577830  0.9806024365002970
0.7491966105469784 -0.0000000146597137  0.9792586185748409
0.7494276184913728 -0.0000000037941167  0.8976310545123297
0.8320231671725824 -0.0000000058381562  0.0193975785836050
0.8344310288326764  0.0000000007038980  0.8904082410771980
0.0717860624309739 -0.0000000005774936  0.8633255755807627
0.0571903297474173  0.0000000036797748  0.7790059287625192
0.9751728351992834 -0.0000000002040964  0.7492814424610519
0.9395472709807442  0.0000000078354715  0.8219728811784380
0.0604527187958062  0.0000000204146861  0.1780271080009909
0.0248271688580613  0.0000000119849462  0.2507185565837386
0.9428096809088232  0.0000000165783728  0.2209940769074198
0.9282139010928754  0.0000000041333614  0.1366744364318276
0.9494224667425984 -0.0000000141273077  0.6664066377477336
0.0070261047825406 -0.0000000199260977  0.6180624853064243
0.0888594119775072 -0.0000000041424984  0.6528198296818012
0.1142899525000175  0.0000000067693781  0.7331789401119119
0.3196428207421306 -0.0000000042601213  0.9895927159217734
0.3950287129631016 -0.0000000097169577  0.0406142243001735
0.3941356653183792 -0.0000000128598058  0.1230847031287205
0.3249792284675940 -0.0000000035283546  0.1535539032372663
0.0505775464064906 -0.0000000008068257  0.3335933759629556
0.9929739056540858 -0.0000000109546558  0.3819375418324114
  
```

|                     |                     |                     |
|---------------------|---------------------|---------------------|
| 0.9111406151144553  | 0.0000000011944592  | 0.3471801913859544  |
| 0.8857100690749958  | 0.0000000145312002  | 0.2668210666264538  |
| 0.6803571798439478  | -0.0000000069185501 | 0.0104072864958669  |
| 0.6049712524423458  | -0.0000000109821165 | 0.9593857434598747  |
| 0.6058643213066868  | -0.0000000176713039 | 0.8769152756851157  |
| 0.6750207966564381  | -0.0000000133412668 | 0.8464460709680306  |
| 0.0054413947622812  | -0.0000000250707399 | 0.4659752817073230  |
| 0.9945586324100724  | -0.0000000296382007 | 0.5340247405463704  |
| 0.4686266317981809  | -0.0000000056140226 | 0.0118761097873928  |
| 0.5313733240767170  | -0.0000000037591056 | 0.9881238678956371  |
| 0.1199028079728236  | 0.0000000150518086  | 0.0341810324157629  |
| 0.8800972076132255  | -0.0000000090165269 | 0.9658189989775176  |
| 0.0015080787034572  | 0.0000000004121344  | 0.8878566085387449  |
| 0.9984918970388162  | 0.0000000022320491  | 0.1121433533531526  |
| 0.8626572339997781  | 0.0000000193728866  | 0.8237562785400686  |
| 0.8542710717524318  | -0.0000000001632935 | 0.0967800746806816  |
| 0.1373427952208822  | 0.0000000330188778  | 0.1762437309196712  |
| 0.1457289308816649  | 0.0000000082991213  | 0.9032199350031553  |
| 0.8869106555455878  | -0.0000000228007927 | 0.6389276723329826  |
| 0.1306740596534117  | -0.0000000005637132 | 0.6137400422177046  |
| 0.1764532269468750  | 0.0000000177746864  | 0.7615547649858437  |
| 0.3143960818259752  | 0.0000000132698915  | 0.9257945313776529  |
| 0.4505836557389807  | 0.0000000059138132  | 0.1647436515980132  |
| 0.3303274078668245  | -0.0000000015316559 | 0.2173630159933835  |
| 0.1130893605677067  | -0.0000000056567023 | 0.3610723399997942  |
| 0.8693259614043777  | -0.0000000049176024 | 0.3862599931400957  |
| 0.8235467745447046  | 0.0000000242474965  | 0.2384452575393260  |
| 0.6856039193601053  | 0.0000000029553837  | 0.0742054774026899  |
| 0.5494163086406575  | 0.0000000031893691  | 0.8352563095457253  |
| 0.6696725953632199  | -0.0000000095551582 | 0.7826369403383528  |
| -0.0000000248311518 | 0.0000000144975783  | -0.0000000335342235 |



ZnPc COF

1.0000000000000000

|                     |                     |                     |
|---------------------|---------------------|---------------------|
| 17.3500003814352688 | 0.0000000000000000  | 0.0000000000000000  |
| 0.0000000000000000  | 20.0000000000000000 | 0.0000000000000000  |
| -3.5480074821132401 | 0.0000000000000000  | 16.9833493794633590 |

|    |   |    |    |
|----|---|----|----|
| C  | N | H  | Zn |
| 36 | 8 | 12 | 1  |

Direct

|                    |                     |                    |
|--------------------|---------------------|--------------------|
| 0.1668505661305616 | 0.0000000464745868  | 0.1107753217107520 |
| 0.2520590618395300 | 0.0000000814388724  | 0.1039300939676080 |
| 0.2524778728595631 | 0.0000001487136193  | 0.0221844900024372 |
| 0.1698686357364270 | 0.0000001136845335  | 0.9815446650907257 |
| 0.7475221284484165 | 0.9999998509580481  | 0.9778155095808635 |
| 0.7479409389691641 | 0.9999999186388797  | 0.8960699066371820 |
| 0.8301313649529157 | 0.9999998866521821  | 0.0184553348905567 |
| 0.8331494332648824 | -0.0000000458278477 | 0.8892246795705347 |
| 0.0730341171748200 | 0.0000000586929953  | 0.8630337472268048 |
| 0.0584917727466893 | -0.0000000042093297 | 0.7787424165494655 |
| 0.9762781453668337 | -0.0000000721764922 | 0.7490192327130029 |
| 0.9400775062183586 | -0.0000000625950767 | 0.8212202851427296 |
| 0.0599224933339158 | 0.0000000618756021  | 0.1787797139903870 |
| 0.0237218529540621 | 0.0000000731471759  | 0.2509807674597206 |
| 0.9415082283923581 | 0.0000000060299852  | 0.2212575843135460 |
| 0.9269658823784108 | 0.9999999413937095  | 0.1369662515397252 |
| 0.9505707556934778 | 0.9999999101692713  | 0.6663511102794831 |
| 0.0079736090053404 | 0.9999999225738687  | 0.6179707823712337 |
| 0.0898783059098340 | -0.0000000577547023 | 0.6523723873481015 |
| 0.1154133139365446 | -0.0000000088332555 | 0.7327155001942045 |
| 0.3212250015487668 | 0.0000001501647760  | 0.9913612398197654 |
| 0.3964110568831578 | 0.0000000828146486  | 0.0424474439870012 |
| 0.3957122845299219 | 0.0000000062869146  | 0.1248773954156970 |
| 0.3263946199469677 | 0.0000000396509243  | 0.1551129118491061 |
| 0.0494292445889810 | 0.0000000904650794  | 0.3336488900213989 |
| 0.9920263913762376 | 0.0000000771104352  | 0.3820292174095786 |

|                    |                     |                    |
|--------------------|---------------------|--------------------|
| 0.9101216940030191 | 0.0000000591410018  | 0.3476276121017800 |
| 0.8845866853218839 | 0.0000000109603703  | 0.2672845003190578 |
| 0.6787749979652504 | -0.0000001508933811 | 0.0086387599776153 |
| 0.6035889442099568 | -0.0000000838366004 | 0.9575525556962962 |
| 0.6042877151557049 | -0.0000000072474763 | 0.8751226045900370 |
| 0.6736053804961873 | -0.0000000400818943 | 0.8448870874023461 |
| 0.0051403970582299 | 0.0000000133140388  | 0.4659106308724017 |
| 0.9948596036003479 | -0.0000000160281930 | 0.5340893674544149 |
| 0.4692064569217747 | 0.0000000182503702  | 0.0128273476957778 |
| 0.5307935424967406 | -0.0000000195429671 | 0.9871726521340057 |
| 0.1220890942488009 | 0.0000000097232387  | 0.0351916443218611 |
| 0.8779109057612142 | -0.0000000086621913 | 0.9648083575226195 |
| 0.0022282968220164 | -0.0000000018946174 | 0.8867927026774665 |
| 0.9977717017752676 | -0.0000000000355543 | 0.1132072956291560 |
| 0.8628895569842365 | 0.9999999192012473  | 0.8231093508976622 |
| 0.8530980305380418 | -0.0000001685700452 | 0.0960725696902024 |
| 0.1371104414326958 | 0.0000000804059074  | 0.1768906512481991 |
| 0.1469019704604566 | 0.0000001686388350  | 0.9039274312808852 |
| 0.8880145839793357 | -0.0000000566034779 | 0.6393073900673695 |
| 0.1314016284032769 | -0.0000001187996041 | 0.6129884023174578 |
| 0.1775788326215535 | 0.9999999875598079  | 0.7610287105123565 |
| 0.3159301779658690 | 0.0000001838980338  | 0.9276008818375363 |
| 0.4521819142014937 | 0.9999999592182178  | 0.1665583057221016 |
| 0.3313708357995061 | 0.0000000388684657  | 0.2188688333470197 |
| 0.1119854163944711 | 0.0000000564382782  | 0.3606926098567694 |
| 0.8685983716808507 | 0.0000001199890010  | 0.3870115975987348 |
| 0.8224211672215880 | 0.0000000140439306  | 0.2389712893084534 |
| 0.6840698220992392 | 0.9999998143675642  | 0.0723991180198916 |
| 0.5478180858035508 | 0.0000000412433514  | 0.8334416939129976 |
| 0.6686291643246788 | -0.0000000382824526 | 0.7811311662875503 |
| 0.0000000000665936 | -0.0000000003225879 | 0.0000000006183639 |
